# 1 **Burnout Syndrome and coping mechanisms among Prison Officers at** 2 **Nsawam Medium Security Prison, Eastern Region, Ghana**

3 <sup>1,2</sup>Florence Djoletoe, <sup>2</sup>Philip Teg-Nefaah Tabong

4

5 <sup>1</sup>Ghana Prisons Service, P. O. Box 129, Accra, Ghana.

6 <sup>2</sup>Department of Social and Behavioural Sciences, School of Public Health, Post Office Box LG 13,  
7 College of Health Sciences, University of Ghana, Legon

8 \*Corresponding author: [ptabong@ug.edu.gh](mailto:ptabong@ug.edu.gh)

9

## 10 **Abstract**

11 Workplace burnout negatively affects employees' productivity, organizational effectiveness, social  
12 stability, and personal health and performance. Burnout is a syndrome comprising emotional exhaustion,  
13 depersonalization, and loss of personal accomplishment. In Ghana, there are several studies on job-related  
14 burnout among health workers but very little on this syndrome in different professional groups like prison  
15 officers. Thus, this study assessed burnout syndrome, associated factors, and coping strategies among  
16 Prison Officers at Nsawam Medium Security Prison. This was a cross-sectional study involving 266  
17 prison officers from the Nsawam Medium Security Prison. A self-administered questionnaire was used to  
18 collect data from participants. Data was collected on sociodemographic characteristics, workplace  
19 environment, coping strategies, and burnout. The Maslach Burnout Inventory-Human Services scale was  
20 adopted for this study. The data was analysed using STATA 16. Descriptive Statistical methods were  
21 used to summarize socio-demographic characteristics of participants. Bivariable analysis using Pearson's  
22 Chi Square was used to determine the association between demographic and work-related factors and  
23 burnout. Multivariate logistic regression was used to determine factors associated with burnout at 95%  
24 significance level. The prevalence of burnout was 9%. The main causes of burnout perceived by POs  
25 were irregular shifts (71.6%), heavy workload (49.0%) and lack of training and opportunities for  
26 development (47.7%). Male prison officers had 69% reduction in the odds of burnout compared to their  
27 female counterparts (AOR: 0.31; 95% CI= 0.13-0.75, p=0.009). Also, prison officers with  
28 diploma/certificate had 89% reduction in odds to burnout compared to those with postgraduate degrees  
29 (AOR: 0.11; 95% CI= 0.02-0.69, p=0.019). Talking to colleagues (62.5%), looking forward to off duty  
30 (60.1%), talking to family (54.3%), and keeping thoughts and feelings to oneself (42.1%) were the  
31 dominant coping strategies. Overall, the prevalence of burnout among prison officers in this study was  
32 low. Heavy workloads, erratic shift schedules, and a lack of training and career development chances  
33 contribute to prison officers' burnout. Additionally, shift allocations need to be changed to lessen officer  
34 burnout.

35

36

37

38

39

## 40 **Background**

41 Over the last decades, social changes such as increased job deregulation, job insecurity, conflicting  
42 conditions, heavy workload, and work-related stress associated with demands of high standards, quality  
43 service, and tight competition [1] have caused modifications at the workplace globally. This resulted in  
44 workers becoming emotionally and physically worn out, which has led to an uncontrollable buildup of  
45 workload and high levels of burnout. Recognized as a global public health issue, and a problem, before  
46 the COVID-19 pandemic, burnout is expected to get far worse with the ongoing crisis [2]. Burnout is a  
47 state of physical and emotional tiredness brought on by long-term job-related stress or by working in a  
48 physically or emotionally demanding position. According to Maslach and Jackson [3], the syndrome has  
49 three components: emotional weariness, depersonalization, and loss of sense of accomplishment. Chronic  
50 stress is recognized as the key factor resulting in burnout. In addition, adopting negative coping strategies  
51 contribute to the maintenance and worsening of burnout symptoms.

52 The World Health Organization (WHO) classified burnout as an “occupational phenomenon” in  
53 2019 with a prevalence of 20% in active people [4]. It is reportedly becoming more prevalent  
54 among workers worldwide [5]. Geographical regions and professions have been found to have  
55 significant differences globally [6]. For instance, it has been found that sub-Saharan African and  
56 Asian regions had the greatest prevalence rates of burnout symptoms among healthcare  
57 professionals, whereas European and Central Asian regions have the lowest rates [7]. Also, a recent  
58 report by Schaufeli, [8] suggests that 10% of the European Union workforce in Europe feels burned  
59 out on average. Clearly, the dynamics operating in African prisons are substantially different from  
60 those found in Western countries [9]. After almost two decades of ethnographic studies on prisons  
61 in East, West, and North Africa, the field has been found to achieve modest advancements in scope  
62 and reach as well as relevance and sophistication. Similar to the global picture, there are  
63 differences in geographical regions with respect to the inmate population and prison work  
64 characteristics resulting in burnout among POs [10,11]. Taken together, under the pressure of  
65 overwhelming social, economic, and political challenges observed in most African countries,  
66 burnout rates are observed to be high [8].

67 Burnout may have an impact on an individual's quality of life [12] as well as the operations of an  
68 organization in terms of physical, psychological, behavioral, and defensive symptoms. Prison officers  
69 have been recognized as an underserved and at-risk workforce that, in comparison to persons in other  
70 professions, has a higher prevalence of mental and physical illness [13]. They are at risk of burnout due to  
71 the general adverse conditions characterized by the nature of their work, which includes a variety of  
72 institutional and occupational factors [14]. These working conditions increase their chronic exposure to  
73 stress, which is the main cause of exhaustion. Coping, the capacity of persons under stress, and the tools  
74 at their disposal for dealing with stress are all closely tied to the level of work-related stress.

75 Currently, burnout is a global public health concern. It was a problem before the COVID-19 pandemic,  
76 and because of the current crisis, it is predicted to get far worse [2]. Although as an institution,  
77 management of preventive measures would be difficult given the inherent stressors that characterize  
78 prison officers' work, such as irregular work hours, and a heavy workload [15], it is acknowledged that  
79 burnout among correctional officers needs urgent attention [14]. Evidence suggests that burnout  
80 syndrome and subsequent performance are likely to be impacted by the frequency and length of workdays  
81 [16].

82 Despite indications of research on job-related stress leading to burnout among Ghanaian workers, most of  
83 these studies have focused almost exclusively on health professionals. Providing safe custody and the  
84 well-being of convicts is the primary duty of the prison officer [17]. Anecdotal evidence show that job  
85 requirement puts pressure and strain on the personnel. For example report available at the prison service  
86 show that a total of 102 working days were missed in one month for the year 2021[18]. As a result, the  
87 affected officers missed an average of 6 days of work during the thirty-day period [18]. This compels the  
88 already understaffed, physically fit officers to continue doing the same amount of work, which hinders the  
89 Service's capacity to carry out its mandate. On the other hand, evidence shows that POs experience high  
90 levels of burnout because of the distinctive characteristics of their job, far higher than the 46% prevalence  
91 rate observed across working populations [19]. About a third (37%) of correctional staff may exhibit  
92 burnout related symptoms and this may vary across socio-demographic characteristics and individual  
93 coping mechanism [13,16]. In contrast to prisoners in custody, who have several programs to assist them  
94 to effectively manage the stress of their living environment, prison officers who spend most of their time  
95 in the same space have little resources to help them handle the stress of the prison setting [20]. Moreover,  
96 prior research in the Ghanaian prison system mostly ignored the health of the prison officers in favour of  
97 the prisoners. This can have negative implications for the Prison Service's efforts to effectively contribute  
98 to the reduction in Ghana's crime rate [10]. This study therefore investigated the prevalence of burnout,  
99 associated factors and coping strategies adopted by POs to provide evidence that may improve health and  
100 wellbeing of service officers.

101

## 102 **Methods and Materials**

### 103 **Ethical Consideration**

104 Approval for the study was sought from Ghana Health Service Ethics Review Committee. Approval was  
105 given (GHS-ERC:041/01/23). Ghana Prison Service Administration, Headquarters also gave approval  
106 prior to data collection. All participant gave a written consent before data elicitation.

107

### 108 **Study Area**

109 The study was carried out in the Nsawam Medium Security Prison. This Prison is in the Nsawam-  
110 Adoagyire Municipality, in the Eastern Region. This area holds the largest prison establishment in Ghana  
111 in terms of inmate population and staff strength (GPS and Ghana Prisons Council, 2014). Records show  
112 that this prison has 1350 inmates and an estimated staff strength of 608 [21].

113

### 114 **Study Design**

115 A quantitative methods approach was adopted for this study. It was a descriptive cross-sectional study.  
116 This type of study involves selecting a cross section of Prison Officers working in the Nsawam Medium  
117 Security Prison for data elicitation.

118

### 119 **Study Population**

120 The population for the study comprises Prison Officers of the Ghana Prison Service who perform general  
121 duties at the NMSP. Officers actively working at the prison at any point in time may belong to one of  
122 these groups; officers in training (Recruit officers or Cadet officers); junior rank (non-commissioned  
123 officers) or senior rank (commissioned officers). General duties include escorting, custody, and control of  
124 inmates, as well as administrative and supervisory roles (Ghana Prisons Service Ten Year Strategic  
125 Development Plan, 2014). POs who have been performing general yard duties for six months or more  
126 were recruited.

### 127 **Inclusion and Exclusion Criteria**

128 Prison Officers who perform general duties at the NMSP were included in this study. However, those on  
129 annual at the time of data collection were excluded.

### 130 **Sample Size Determination**

131 Using the Taro Yamane's formula for known population [22] with an assumption of 95% level of  
132 confidence, the population of prison officers as given by the Eastern Regional Command of the Ghana  
133 Prisons Service was 608. The Yemane formula for cross-sectional study:

$$134 \quad n = \frac{N}{1 + Ne^2}$$

135 Where n = sample size

136 N= Total NSMP officer population

137 e = Margin of error set at 0.05

138 N= 608 (Ghana Prisons Service, 2020)

$$139 \quad n = \frac{608}{1 + (608)(0.05)^2}$$

$$140 \quad = 241.26$$

$$141 \quad = 242$$

142

143 The minimum sample size considering a 10% non-response rate (Nix et al., 2019) was 266.

### 144 **Sampling Technique**

145 A proportionate stratified random sampling was adopted in recruiting participants for the study. A list of  
146 the officers was obtained from the Eastern Regional Command of GPS and divided into two groups based  
147 on their corps (commissioned and non-commissioned respectively). A sample size proportionate to each  
148 group is selected using simple random sampling and the result combined to make the sample for the study  
149 (Table 1).

150 Number of commissioned officers present = 110

151 Number of non-commissioned officers present = 498

152 Total number of officers (n) = 608

153 Sample size (n) = 267  
154 Sample fraction =  $\frac{n}{N}$  = 266/ 608  
155 = 7/16  
156  
157  
158  
159

160 Table 1: Number of participants required from each corps for the study

| Officer Rank     | Number of Officers | $(n \div N) \times$ number of officers | Participants number |
|------------------|--------------------|----------------------------------------|---------------------|
| Commissioned     | 110                | 110 $\times$ 7/16                      | 49                  |
| Non-commissioned | 498                | 498 $\times$ 7/16                      | 217                 |
| Total            |                    |                                        | 266                 |

161  
162 Participants were selected using pieces of paper with the option YES and NO in a bowl from which  
163 officers were allowed to pick one. Those who picked yes were given a briefing about the study and  
164 participants who consented were recruited for the study. The data collection started on the 5th of February  
165 2023 and completed on the 18th May, 2023.

166  
167 **Data Collection Tool**

168 Data was collected using self-administered questionnaires assessing burnout among the POs. Both open  
169 and closed-ended questions were used to capture information relevant to identifying POs socio-  
170 demographics, what they perceive as causes of burnout, and coping mechanisms adopted. The  
171 questionnaire was adapted from the Maslach Burnout Inventory-Human Services Survey (MBI-HSS)  
172 [23], the Work Environment Scale [24] and the Coping Methods Checklist [25]. These are validated tools  
173 and have been used in similar studies with other fields such as health workers in Ghana [26,27].

174  
175 The questionnaire comprised four sections. The first section included data on socio-demographic factors:  
176 age, sex, educational level, marital status, and work characteristics such as: rank, years of service and  
177 supervisory role. The second section gathered information on POs' perception of the workplace using the  
178 Work Environment Scale and to identify what officers perceived to be causes of burnout. The Work  
179 Environment Scale [24] consists of seventeen statements that measures the social environment of work  
180 settings. It assesses employee's perceptions of workplace using the dimensions of relationships, personal  
181 growth, and the system maintenance by either agreeing or disagreeing to the statements.

182 Burnout was measured using the MBI-HSS that explores the three dimensions of burnout: emotional  
183 exhaustion, depersonalization, and professional accomplishment, in the third section.

184 The adapted 22-item MBI-HSS has each statement rated on a seven-point likert scale that measures how  
185 often officers experience a particular feeling from 0 (never) to 6 (everyday). It measures burnout using the  
186 three constructs.

187 EE with 9 items

188 DP with 5 items

189 LPA with 8 items

190 The Coping Methods Checklist was adapted in the last section to gather data on the different interventions  
191 adopted by POs to reduce burnout. This adapted seventeen (17) statements tool is useful in assessing  
192 perceived efficacy of various coping strategies in relation to chronic job-related stress ([28]. Participants  
193 indicated from a list coping strategy which was helpful in managing burnout. However, “others” option  
194 was available for people to indicate coping strategies that were not part of the list.

### 195 **Data Collection Technique**

196 After one of the prison facility’s weekly meetings, participants were given an information sheet prior to  
197 the administration of the questionnaire. This was a summary of the study in simplified language.  
198 Participants were allowed questions for clarification of doubts which were answered appropriately.  
199 Consenting participants were made to complete a hardcopy version of the questionnaire.

### 200 **Data Analysis**

201 Of the 266 participants, 245 questionnaires were returned and after data cleaning, 243 had been filled and  
202 used for analysis. Data were exported to STATA version 16 and coded for analysis (StataCorp, 2019).  
203 Descriptive statistical measures were used to describe the socio-demographic factors and work  
204 characteristics of participants. The scores in each dimension are used to characterize the level of burnout  
205 as high, moderate, or low.

206 The MBI-HSS tool, a 7-point Likert scale, was used to measure the three constructs of burnout.

207 0 = Never 4= Once a week

208 1= At least a few times a year 5= Several times a week

209 2= At least once a month 6= Everyday

210 3= Several times a month

211 Scores for each construct were then computed and categorized. For EE, the scale was categorized as Low  
212 ( $\leq 16$ ), Moderate (17-26) and High ( $\geq 27$ ). Additionally, the DP scale was categorized as Low ( $\leq 6$ ),  
213 Moderate (7-12) and High ( $\geq 13$ ). Finally, PA was also categorized as Low ( $< 31$ ), Moderate (32-38) and  
214 High ( $\geq 39$ ) (Table 2).

215 Table 2 Source used for burnout levels assessment

|                      | Low       | Moderate | High      |
|----------------------|-----------|----------|-----------|
| Emotional exhaustion | $\leq 16$ | 17-26    | $\geq 27$ |



|                         |      |       |      |
|-------------------------|------|-------|------|
| Depersonalization       | ≤6   | 7-12  | ≥ 13 |
| Personal accomplishment | ≥ 37 | 31-36 | ≤30  |

216

217 Scores for EE, DP and PA were summarized as means and standard deviations. Burnout was computed as  
 218 a composite variable using scores from participants. The definition of burnout adopted for the study as  
 219 provided by Abdo et al., [29] and Dubale et al., [30] was high scores on EE and DP and low scores on  
 220 PA. Thus, participants with high EE, high DP and low PA were said to be burned out while those who did  
 221 not fall in this categorization were classified as not burned out.

222 Additionally, assessing data on perceived causes of burnout and coping skills adopted by POs using the  
 223 Coping Methods Checklist were also presented as frequencies and percentages.

224 Chi-square/Fisher’s Exact where appropriate were used to determine the relationship between socio-  
 225 demographic characteristics, EE, DP, PA and Burnout. P-values less than 0.05 were considered  
 226 statistically significant. Multivariate logistic regression was used to determine factors associated with  
 227 burnout. Based on this, a dichotomous variable was created “0” (no burn out) and “1” (burn out). The  
 228 outcome of interest was burnout. Strengths of association between independent variables and burnout  
 229 were determined using crude odds ratio. Variables with p-value of <0.05 in unadjusted logistic regression  
 230 model (COR) were considered for inclusion into the multivariate logistic regression analyses, adjusted  
 231 logistic regression (AOR). Issues relating to cofounders were addressed using multilinear collinearity  
 232 using the Variance of Inflation Factor (VIF) command in Stata. To test for goodness of fit of Model II, the  
 233 likelihood ratio test was used to examine the likelihood of data under the full model as against the  
 234 likelihood of the data under a model with reduced number of independent variables. A p-value for the  
 235 overall model obtained was less than 0.05. Thus, it was concluded the model was good. P-values less than  
 236 0.05 were considered statistically significant. The results have been presented in tables and graphs.

## 237 **Results**

### 238 **Socio-demographic and work characteristics of prison officers**

239 The total number of prison officers recruited for this study was two hundred and sixty-six (266). Of this,  
 240 245 questionnaires were returned and two hundred and forty-three (243) used for analysis (Table 3). The  
 241 participation rate of this study was 92%.

242 The study revealed that while about half (47.29%) of the respondents were between the ages 20-30 years,  
 243 their ages range between eighteen to fifty-eight (18-58) years. The mean age of officers was  $32.40 \pm 7.55$   
 244 years. Majority (68.31%) were male. Additionally, more than half were single (57.61%), had attained  
 245 senior high school education (54.73%), have been working in prison service for less than five years  
 246 (60.90%) and were junior ranked officers (78.19%). Moreover, 19.34% worked as schedule heads. The  
 247 predominant shift (59.26%) engaged by officers within the past 6 months was the main shift (8am-4pm).  
 248 Less than half (48.15%) indicated they had children and a greater proportion reported not having chronic  
 249 conditions (90.95%).

250 Table 3: Sociodemographic characteristics of prison officers

| Characteristic | Frequency             | Percentage |
|----------------|-----------------------|------------|
| Age            | Mean (SD)= 32.4 (7.5) |            |
| 20-30          | 115                   | 47.29      |

|                        |     |       |
|------------------------|-----|-------|
| 31-40                  | 102 | 42.00 |
| 40+                    | 26  | 10.71 |
| Sex                    |     |       |
| Female                 | 77  | 31.69 |
| Male                   | 166 | 68.31 |
| Marital status         |     |       |
| Single                 | 140 | 57.61 |
| Married                | 98  | 40.33 |
| Divorced/widowed       | 5   | 2.05  |
| Education              |     |       |
| SHS                    | 133 | 54.73 |
| Diploma/certificate    | 45  | 18.52 |
| Degree                 | 53  | 21.81 |
| Postgraduate           | 12  | 4.94  |
| Work experience        |     |       |
| <5 years               | 148 | 60.90 |
| 5-10 years             | 39  | 16.00 |
| 10+ years              | 56  | 23.10 |
| Rank                   |     |       |
| Junior                 | 190 | 78.19 |
| Senior                 | 53  | 21.81 |
| Schedule Head          |     |       |
| No                     | 196 | 80.66 |
| Yes                    | 47  | 19.34 |
| Shift Allocation       |     |       |
| Early                  | 60  | 24.69 |
| Late                   | 16  | 6.58  |
| Main                   | 144 | 59.26 |
| Night                  | 23  | 9.47  |
| Have children          |     |       |
| No                     | 126 | 51.85 |
| Yes                    | 117 | 48.15 |
| Have chronic condition |     |       |
| No                     | 221 | 90.95 |
| Yes                    | 22  | 9.05  |

251

## 252 Prevalence of burnout among prison officers

253 The three dimensions of burnout were measured using the 22-item Maslach Burnout Inventory–Human  
 254 Services Survey tool (MBI-HSS). The summary of scores for each construct is summarized in Table 4.  
 255 Overall, 25.9% of the officers had low emotional exhaustion (EE), 42.0% had high emotional exhaustion.  
 256 Furthermore, the distribution of the three categories of depersonalization (DP) were similar for the  
 257 officers: Low (35.4%), Moderate (32.1%) and High (32.5%). Regarding personal accomplishment, the  
 258 majority (68.7%) of the participants had low personal accomplishment while only 14% had high personal  
 259 accomplishment (Figure 1).

260 Table 4: scores of dimensions of burnout among prison officers



| Variable                | Minimum | Maximum | Mean | SD   |
|-------------------------|---------|---------|------|------|
| Emotional Exhaustion    | 0       | 54      | 24.9 | 12.5 |
| Depersonalization       | 0       | 30      | 10.6 | 7.4  |
| Personal Accomplishment | 0       | 48      | 26.3 | 10.7 |

261

262

263 Figure 1: Distribution of Dimensions of Burnout among Prison Officers

264

265

266 Burnout was defined as a high EE ( $\geq 27$ ) or high DP ( $\geq 10$ ) and low PA ( $\leq 33$ ). Overall, the prevalence of  
267 burnout syndrome among the prison officers was 9% (Figure 2).

268

269

270 Figure 2 Prevalence of Burnout among Prison Officers

271

### 272 **Perceived causes of burnout among prison officers**

273 Perceived causes of burnout were assessed among POs in this study (Figure 3). The respondents  
274 identified various causes they perceived which include irregular shifts (71.6%), heavy workload (49.0%)  
275 and lack of training and opportunities for development (47.7%). Others included lack of autonomy  
276 (35.8%), no variety and poor social status (28.0%).

277

278 Figure 3 Perceived Causes of Burnout among prison officers.

279

### 280 **Assessment of prison work environment**

281 Table 5 represents how POs rate the prison work environment. More than half (56.4%) disagreed that  
282 there is a positive and supportive culture and emotional climate, agreed they felt like part of a team  
283 (59.3%) and felt challenged when assigned tests to stretch their efforts (58.4%). Additionally, 59.7%  
284 disagreed that their efforts were recognized and received constructive feedback (55.1%). Furthermore,  
285 74.1% agreed they took pride in their work and workplace, felt they were in control of their work (71.2%)  
286 and felt accepted and valued by their colleagues (72.0%). On the contrary 50.6% disagreed they trusted  
287 their superiors to be there for them, disagreed they felt safe sharing their plans with the officer in charge  
288 and disagreed the rewards for success were greater than the penalties (62.1%).

289

290 Table 5 Rating of prison work environment

| Statement                                                                                                                   | Agree<br>N(%) | Disagree<br>N(%) |
|-----------------------------------------------------------------------------------------------------------------------------|---------------|------------------|
| The culture and emotional climate of the prison is generally positive and supportive ie welfare, health,                    | 106(43.6)     | 137(56.4)        |
| I feel like I am part of a team (shared vision, goals, efforts)                                                             | 144(59.3)     | 99(40.7)         |
| I feel challenged and assigned allocations that inspire, test and stretch my efforts                                        | 142(58.4)     | 101(41.6)        |
| My efforts are recognized in a tangible way e. g. awards                                                                    | 98(40.3)      | 145(59.7)        |
| I receive constructive feedback in a way that emphasizes positives rather than negatives                                    | 109(44.9)     | 134(55.1)        |
| Innovation is expected of me, and I am encouraged to take initiative                                                        | 127(52.3)     | 116(47.7)        |
| I have clear-cut and non-contradictory instructions on my job description                                                   | 123(50.6)     | 120(49.4)        |
| I believe in and take pride in my work and my workplace                                                                     | 180(74.1)     | 63(25.9)         |
| I feel in control of my work and capable of competently carrying out my duty duties                                         | 173(71.2)     | 70(28.8)         |
| I feel accepted and valued by my colleague officers                                                                         | 175(72.0)     | 68(28.0)         |
| I feel accepted and I'm treated with courtesy, listened to and invited to express my thoughts and feelings by my superiors. | 135(55.6)     | 108(44.4)        |
| The station's administrative team provides an environment in which I feel safe and secure                                   | 115(47.7)     | 128(52.7)        |
| I believe administration considers my needs and preference when making decisions.                                           | 99(40.7)      | 144(59.3)        |
| My professional judgement is respected by my superiors; I have adequate freedom to exercise my judgement and expertise      | 94(38.7)      | 149(61.3)        |
| I trust my superiors to be there for me and back me up.                                                                     | 120(49.4)     | 123(50.6)        |
| I feel safe sharing my plans, programs and policies with my OIC                                                             | 118(48.8)     | 124(51.2)        |
| The rewards for success are greater than the penalties for failure                                                          | 92(37.9)      | 151(62.1)        |

291

292

### 293 **Association between dimensions of burnout and demographic characteristics**

294 The Pearson's chi-square test was used to assess the association between demographic characteristics of  
 295 respondents and the three constructs of burnout syndrome (Table 6). Results showed that all other socio-  
 296 demographics, aside shift allocation was significantly associated with emotional exhaustion (p=0.010).  
 297 The percentage of emotional exhaustion was significantly higher among POs who run main shift (68.0%)  
 298 compared to those with early (22.5%), night (17.7%) and late (5.9%) shifts. Furthermore, officer rank was  
 299 also significantly associated with depersonalization (p=0.010). The percentage of depersonalization was  
 300 significantly higher among junior officers (76.0%) as compared to senior officers (24.0%). No  
 301 sociodemographic characteristic had a statistically significant association with personal accomplishment.

Table 6 Association between constructs of burnout and socio-demographic characteristics

|                     | Emotional Exhaustion |                  |              | p-value | Depersonalization |                  |              | p-value | Personal Accomplishment |                  |              | p-value |
|---------------------|----------------------|------------------|--------------|---------|-------------------|------------------|--------------|---------|-------------------------|------------------|--------------|---------|
|                     | Low<br>N(%)          | Moderate<br>N(%) | High<br>N(%) |         | Low<br>N(%)       | Moderate<br>N(%) | High<br>N(%) |         | Low<br>N(%)             | Moderate<br>N(%) | High<br>N(%) |         |
| Age                 |                      |                  |              |         |                   |                  |              |         |                         |                  |              |         |
| 20-30               | 30(47.6)             | 33(42.3)         | 52(51.0)     | 0.657   | 42(48.8)          | 29(37.2)         | 44(55.7)     | 0.154   | 80(47.9)                | 19(45.2)         | 16(47.1)     | 0.170   |
| 31-40               | 26(41.3)             | 38(48.7)         | 38(37.2)     |         | 33(38.4)          | 41(52.6)         | 28(35.4)     |         | 73(43.7)                | 14(33.3)         | 15(44.1)     |         |
| 40+                 | 7(11.1)              | 7(9.0)           | 12(11.8)     |         | 11(12.8)          | 8(10.3)          | 7(8.9)       |         | 14(8.4)                 | 9(21.4)          | 3(8.8)       |         |
| Sex                 |                      |                  |              |         |                   |                  |              |         |                         |                  |              |         |
| Female              | 16(25.4)             | 22(28.2)         | 39(38.2)     | 0.165   | 27(31.4)          | 21(26.9)         | 29(36.7)     | 0.419   | 58(34.7)                | 10(23.8)         | 9(26.5)      | 0.309   |
| Male                |                      | 56(71.9)         | 63(61.8)     |         | 59(68.6)          | 57(73.1)         | 50(63.3)     |         | 109(65.3)               | 32(76.2)         | 25(73.5)     |         |
| Marital status      |                      |                  |              |         |                   |                  |              |         |                         |                  |              |         |
| Single              | 30(47.6)             | 1(1.3)           | 2(2.0)       | 0.440   | 46(53.5)          | 41(52.6)         | 53(67.1)     | 0.061   | 96(57.5)                | 25(59.5)         | 19(55.9)     | 0.989   |
| Married             | 31(49.2)             | 29(37.2)         | 38(37.2)     |         | 36(41.9)          | 37(47.4)         | 25(31.6)     |         | 68(40.7)                | 16(38.1)         | 14(41.2)     |         |
| Divorced/widowed    | 2(3.2)               | 48(61.5)         | 62(60.8)     |         | 4(4.6)            | 0(0.0)           | 1(1.3)       |         | 3(1.8)                  | 1(2.4)           | 1(2.9)       |         |
| Education           |                      |                  |              |         |                   |                  |              |         |                         |                  |              |         |
| SHS                 | 32(50.8)             | 42(53.8)         | 59(57.8)     | 0.928   | 42(48.8)          | 45(57.7)         | 46(58.2)     | 0.265   | 95(56.9)                | 21(50.0)         | 17(50.0)     | 0.453   |
| Diploma/certificate | 12(19.0)             | 16(20.5)         | 17(16.7)     |         | 14(16.3)          | 15(19.2)         | 16(20.5)     |         | 31(18.6)                | 8(19.1)          | 6(17.7)      |         |
| Degree              | 16(25.4)             | 15(19.2)         | 22(21.6)     |         | 27(31.4)          | 14(17.9)         | 12(15.2)     |         | 31(18.6)                | 13(30.9)         | 9(26.5)      |         |
| Postgraduate        | 3(4.8)               | 5(6.4)           | 4(3.9)       |         | 3(3.5)            | 4(5.1)           | 5(6.3)       |         |                         |                  |              |         |
| Work experience     |                      |                  |              |         |                   |                  |              |         |                         |                  |              |         |
| <5 years            | 42(66.7)             | 47(60.3)         | 59(57.8)     | 0.196   | 56(65.1)          | 42(53.9)         | 50(63.3)     | 0.073   | 103(61.7)               | 24(57.1)         | 21(61.8)     | 0.770   |
| 5-10 years          | 9(14.3)              | 17(21.8)         | 13(12.7)     |         | 8(9.3)            | 20(25.6)         | 11(13.9)     |         | 29(17.4)                | 6(14.3)          | 4(11.8)      |         |
| 10+ years           | 12(19.0)             | 14(17.9)         | 30(29.4)     |         | 22(25.6)          | 16(20.5)         | 18(22.8)     |         | 35(20.9)                | 12(28.6)         | 9(26.5)      |         |
| Rank                |                      |                  |              |         |                   |                  |              |         |                         |                  |              |         |
| Senior              | 21(33.3)             | 20(25.6)         | 25(24.5)     | 0.435   | 33(38.4)          | 14(17.9)         | 19(24.0)     | 0.010*  | 42(25.1)                | 14(33.3)         | 10(29.4)     | 0.539   |
| Junior              | 42(66.7)             | 58(74.4)         | 77(75.5)     |         | 53(61.6)          | 64(82.1)         | 60(76.0)     |         | 125(74.9)               | 28(66.7)         | 24(70.6)     |         |
| Schedule Head       |                      |                  |              | 0.308   |                   |                  |              | 0.085   |                         |                  |              | 0.466   |
| No                  | 47(74.6)             | 63(80.8)         | 86(84.3)     |         | 65(75.6)          | 61(78.2)         | 70(88.6)     |         | 137(82.0)               | 31(73.8)         | 28(82.3)     |         |
| Yes                 | 16(25.4)             | 15(19.2)         | 16(15.7)     |         | 21(24.4)          | 17(21.8)         | 9(11.4)      |         | 30(18.0)                | 11(26.2)         | 6(17.7)      |         |
| Shift Allocation    |                      |                  |              |         |                   |                  |              |         |                         |                  |              |         |
| Early               | 21(33.3)             | 16(20.5)         | 23(22.5)     | 0.010*  | 22(25.6)          | 20(25.6)         | 18(22.8)     | 0.220   | 42(25.2)                | 12(28.6)         | 6(17.6)      | 0.380   |
| Late                | 4(6.4)               | 6(7.7)           | 6(5.9)       |         | 5(5.8)            | 4(5.1)           | 7(8.9)       |         | 13(7.8)                 | 1(2.4)           | 2(5.9)       |         |
| Main                | 36(57.1)             | 53(68.0)         | 55(53.9)     |         | 54(62.8)          | 49(62.8)         | 41(51.9)     |         | 100(59.9)               | 22(52.4)         | 22(64.7)     |         |
| Night               | 2(3.2)               | 3(3.8)           | 18(17.7)     |         | 5(5.8)            | 5(6.4)           | 13(16.5)     |         | 12(7.2)                 | 7(16.7)          | 4(11.8)      |         |

|                   |          |          |          |       |          |          |          |       |           |          |          |       |
|-------------------|----------|----------|----------|-------|----------|----------|----------|-------|-----------|----------|----------|-------|
| Have children     |          |          |          |       |          |          |          |       |           |          |          |       |
| No                | 27(42.9) | 41(52.6) | 58(56.9) | 0.214 | 43(40.0) | 35(44.9) | 48(60.8) | 0.125 | 89(53.3)  | 19(45.2) | 18(52.9) | 0.640 |
| Yes               | 36(57.1) | 47(47.4) | 44(43.1) |       | 43(50.0) | 43(55.1) | 31(39.2) |       | 78(46.7)  | 23(54.7) | 16(47.1) |       |
| Chronic condition |          |          |          |       |          |          |          |       |           |          |          |       |
| No                | 59(93.6) | 71(91.0) | 91(89.2) | 0.628 | 77(89.5) | 73(93.6) | 71(89.9) | 0.612 | 155(92.8) | 37(88.1) | 29(85.3) | 0.295 |
| Yes               | 4(6.4)   | 7(9.0)   | 11(10.8) |       | 9(10.5)  | 5(6.4)   | 8(10.1)  |       | 12(7.2)   | 5(11.9)  | 5(14.7)  |       |

\*Statistically significant at  $p < 0.05$

302 **Factors associated with burnout among prison officers**

303 A Pearson chi square test showed sex was significantly associated with burn out (p=0.016). The  
 304 percentage of burnout was significantly higher among female officers (54.5%) compared to their male  
 305 counterparts (45.5%). A logistic regression model was used to predict socio-demographic factors  
 306 associated with burnout (Table 7). The model predicted sex and education to be significant factors  
 307 associated with burnout among the prison officers. Male prison officers had 69% reduction in the  
 308 odds of burnout compared to their female counterparts (AOR: 0.31; 95% CI= 0.13-0.75, p=0.009).  
 309 Also, prison officers with diploma/certificate had 89% reduction in the odds of burnout compared to  
 310 those with postgraduate degrees (AOR: 0.11; 95% CI= 0.02-0.69, p=0.019).

311

312 Table 7 Factors associated with burnout among prison officers

| Variable            | Burn out  |          | p-value | Unadjusted       |         | Adjusted        |         |
|---------------------|-----------|----------|---------|------------------|---------|-----------------|---------|
|                     | No        | Yes      |         | OR (95% CI)      | p-value | OR (95% CI)     | p-value |
| Age                 |           |          |         |                  |         |                 |         |
| 20-30               | 104(47.1) | 11(50.0) |         | 1                |         |                 |         |
| 31-40               | 93(42.1)  | 9(40.9)  | 0.950   | 0.91(0.36-2.30)  | 0.851   |                 |         |
| 40+                 | 24(10.9)  | 2(9.1)   |         | 0.79(0.16-3.79)  | 0.766   |                 |         |
| Sex                 |           |          |         |                  |         |                 |         |
| Female              | 65(29.4)  | 12(54.5) | 0.016*  | 1                |         | 1               |         |
| Male                | 156(70.6) | 10(45.5) |         | 0.35(0.14-0.84)  | 0.020*  | 0.31(0.13-0.75) | 0.009*  |
| Marital status      |           |          |         |                  |         |                 |         |
| Single              | 116(57.0) | 14(63.6) |         | 1                |         |                 |         |
| Married             | 90(40.7)  | 8(36.4)  | 0.689   | 0.82(0.33-1.99)  | 0.660   |                 |         |
| Divorced/widowed    | 5(2.3)    | 0(0.0)   |         | 0.79(0.04-15.09) | 0.877   |                 |         |
| Education           |           |          |         |                  |         |                 |         |
| SHS                 | 121(54.7) | 12(54.6) |         | 0.30(0.07-1.24)  | 0.098   | 0.25(0.06-1.02) | 0.054   |
| Diploma/certificate | 43(19.5)  | 2(9.1)   | 0.181   | 0.14(0.02-0.95)  | 0.045*  | 0.11(0.02-0.69) | 0.019*  |
| Degree              | 48(21.7)  | 5(22.7)  |         | 0.32(0.06-1.55)  | 0.154   | 0.29(0.06-1.37) | 0.117   |
| Postgraduate        | 9(4.1)    | 3(13.6)  |         | 1                |         | 1               |         |
| Work experience     |           |          |         |                  |         |                 |         |
| <5 years            | 134(60.6) | 14(63.6) | 0.623   | 1                |         |                 |         |
| 5-10 years          | 37(16.7)  | 2(9.1)   |         | 0.52(0.11-2.38)  | 0.397   |                 |         |
| 10+ years           | 50(22.6)  | 6(27.3)  |         | 1.14(0.42-3.15)  | 0.788   |                 |         |
| Rank                |           |          |         |                  |         |                 |         |
| Senior              | 58(26.2)  | 8(36.4)  | 0.309   |                  |         |                 |         |
| Junior              | 163(73.8) | 14(63.6) |         | 1.60(0.64-4.02)  | 0.312   |                 |         |
|                     |           |          | 0.477   |                  |         |                 |         |
| Schedule Head       |           |          |         |                  |         |                 |         |
| No                  | 177(80.1) | 19(86.4) |         | 1                |         |                 |         |
| Yes                 | 44(19.9)  | 3(13.6)  |         | 0.63(0.18-2.24)  | 0.481   |                 |         |
| Shift Allocation    |           |          |         |                  |         |                 |         |
| Early               | 56(25.3)  | 4(18.2)  |         | 1                |         |                 |         |
| Late                | 14(6.3)   | 2(9.1)   | 0.662   | 2.00(0.33-12.04) | 0.449   |                 |         |
| Main                | 129(58.4) | 15(68.2) |         | 1.63(0.52-5.12)  | 0.405   |                 |         |
| Night               | 22(9.9)   | 19(4.5)  |         | 0.64(0.07-6.01)  | 0.693   |                 |         |
| Have children       |           |          |         |                  |         |                 |         |
| No                  | 112(50.7) | 14(63.6) | 0.246   | 1                |         |                 |         |
| Yes                 | 109(49.3) | 8(36.4)  |         | 0.59(0.24-1.45)  | 0.250   |                 |         |
| Chronic condition   |           |          |         |                  |         |                 |         |
| No                  | 201(91.0) | 20(90.9) | 0.995   | 1                |         |                 |         |
| Yes                 | 20(9.0)   | 2(9.1)   |         | 1.01(0.22-4.62)  | 0.995   |                 |         |

313 Statistically significant at p<0.05

314

## 315 **Coping strategies for dealing with stress among prison officers**

316 Participants in this study outlined various coping mechanisms for dealing with stress (Figure 4). The  
317 main coping strategy was talking to colleagues (62.5%). Others reported looking forward to off duty  
318 (60.1%), talking to family (54.3%) and keeping thoughts and feelings to oneself (42.1%). Finally,  
319 alcohol use (29.2%) was the least coping strategy reported by respondents.

320

321

322

323 Figure 4 Coping Strategies for Dealing with Burnout Among Prison Officers

324

## 325 **Discussion**

### 326 **Prevalence of Burnout Among Prison Officers**

327 The overall prevalence of burnout syndrome among prison officers involved in this study was found  
328 to be 9%. This is lower than the over 30% prevalence rate reported by some studies [31,32]. It is  
329 consistent with findings indicative of low to moderate levels of burnout among POs [12], confirming  
330 that all POs will experience burnout in varying proportions [14]. Though conducted among different  
331 worker groups, this study findings are similar to one by Odonkor and Frimpong in 2020 [33], among  
332 Ghanaian health workers where burnout level was reported to be low. Also, Dodam et al., [27] in the  
333 year 2022 found that in comparison to Ghanaian clinicians, non-clinicians experienced burnout  
334 syndrome at a lower rate of 15.64%. This generally low burnout prevalence could be partly  
335 due to cultural contexts like in Ghana where indirect communication is favored, and emotions are  
336 internalized as opposed to people in Western settings where explicit communication is the norm.  
337 Respondents may thus limit the expression of emotions and psychological states.

338 Furthermore, although more than half (56.4%) of the participants disagreed that a positive and  
339 supportive culture and emotional climate existed at the workplace, a good number of them (59.3%)  
340 felt a part of the team and could draw from the social support indirectly to reduce stress leading to  
341 burnout hence the low level [34]. Most officers in this study reported low levels of personal  
342 accomplishment and depersonalization, but high scores of emotional exhaustions). There is a  
343 difference in prison systems between African and Western countries [9] and this disparities in the  
344 findings can be attributed to the difference in geographical locations and characteristics of individuals  
345 in different locations [11,35]. In addition, prison officers involved in the current study reported some  
346 level of satisfaction and pride in their work, hence the low levels of depersonalization identified.

347 Regardless of the evidence to show that in resource-constrained settings such as Ghana and Ghanaian  
348 prison setting, POs are likely to show more signs of burnout resulting in lack of motivation and  
349 dedication lowering organizational commitment, unproductive attitudes and counterproductive  
350 behaviours like encouraging inmates to commit crimes while they are in prison custody which will  
351 negatively impact the reformative and rehabilitative process, [10,36], this study found that in addition  
352 the low burnout observed among POs, the pride and satisfaction that majority of them reported would  
353 result in stronger institutional commitment given the right environment. This implies the need for  
354 strengthening self-care issues among professional groups prone to burnout through improvement in  
355 the health and the psychosocial environment to prevent negative work outcomes such as illnesses,  
356 absenteeism, and mental illnesses in future.

### 357 **Perceived Causes of Burnout among Prison Officers and Work Characteristics**



358 Among respondents of this study, the majority perceived irregular shifts as the cause of chronic  
359 stress/burnout. This was followed by a heavy workload and lack of training and opportunities for  
360 development. The least perceptible source of stress was poor social status. These findings were  
361 consistent with findings of a review of about 140 published documents that reported that stressors of  
362 prison officers include their work demands, low levels of professional skills, and lack of  
363 organizational structures in prisons [37]. A study by Misis et al., [38] also indicated that a key source  
364 of stress among prison officers included characteristics of inmates, which is related to prison officers'  
365 workload. Just as the majority of studies attribute correctional officer burnout to the prison  
366 environment as against personal characteristics [39,40], findings from this study showed that  
367 institutional sources of stress regarding work schedules and the organizational climate were perceived  
368 more than those linked to psycho-social factors and logistical support.

369 In assessing the prison work environment, most prison officers (56.4%) reported negatively to a  
370 positive and supportive culture and emotional climate. This was evidenced in the number of officers  
371 who indicated that their efforts were not recognized and failed to receive constructive feedback from  
372 their superiors. In addition, officers did not trust their superiors to be there for them and did not feel  
373 safe sharing their plans with their superiors/officer in charge. Consequently, the responses from prison  
374 officers who partook in this study indicated that the penalties meted out far exceeded the rewards  
375 given for successful work done. Boateng and Hsieh [41], in their study on burnout among POs in  
376 some Ghanaian prisons found that lack of supervisors' support contributes to high-stress levels among  
377 officers. The findings of their study are inconsistent with the findings of this study as participants  
378 were noted to have responded positively about their supervisors. In another study conducted to  
379 evaluate the impact of the work environment on prison staff, the role of supervisors was emphasized  
380 as being a cardinal factor to increase or decrease stress among correctional officers [34]. These can be  
381 attributed to the fact that supervisors encourage the officers not to give up in line of duty.

382 It is recognized that the inherent stressful nature of prisons coupled with resource constraint make it  
383 difficult for GPS administration to manage burnout preventive measures. However, the differences in  
384 how POs perceive conditions within the prison, as a result of difference in shifts assigned, duty points  
385 and objective assessment of conditions experienced [42,43] call for improvement in working  
386 conditions, modification of workloads among others [44].

387 In addition to supervisory influence, peer influence also affects stress and burnout experienced by  
388 correctional officers. Prison officers in this research agreed to the feeling of being part of a team.  
389 Consequently, majority reported taking pride in their work and their workplace, felt accepted and  
390 valued by their colleagues, and felt in control of their work. In a study to explore the relationship  
391 between social support and job burnout among correctional staff, family and friends' support was  
392 found to significantly reduce burnout among correctional staff [34]. These findings can be attributed  
393 to the fact that social support provides a sense of belonging and a feeling of being cared for by one's  
394 social circle. This is also confirmed by the commonest coping style adopted by officers in this study.  
395 These findings suggest the importance of designing and implementing programs focused on  
396 identification of specific aspects of work schedules, work environment and strategies to address them.

### 397 **Influence of Socio-demographic factors on Burnout**

398 Depersonalization among prison officers was found to be significantly associated with officers' rank.  
399 According to the findings, junior officers were more likely to experience depersonalization compared  
400 to senior officers. This finding can be attributed to the fact that junior officers are just getting started  
401 on the job and may experience some form of repulsion from the inmates. On the MBI-HSS,  
402 depersonalization describes being emotionally detached from clients as a means of dealing with  
403 emotional stressors [45], which is a strategy junior officers are likely to employ at the workplace.  
404 Furthermore, supervisory roles are usually held by senior officers and corroborate findings that show  
405 that supervisors perceive less job-related stress and more job satisfaction than their colleagues who

406 were not in authority [34]. Also, consistent with the findings of this study, Morgan et al., [46] reported  
407 that depersonalization among prison officers decreases with increasing age.

### 408 **Burnout Coping Mechanism**

409 Evidence suggests that although organizational and individual-based tools are available for  
410 correctional officers to manage stress, Maricuțoiu et al., [47] revealed that 96% of the interventions  
411 adopted were individualized for each worker, using cognitive-behavioral interventions, interpersonal  
412 skills interventions, relaxation interventions, and other strategies. The commonest coping strategy  
413 prison officers utilized in dealing with stress in this study was found to be talking to colleagues.  
414 Possible reasons for this are that POs' shift system characterized by long hours allow them to engage  
415 with colleagues and prisoners frequently, and the fact that the majority of respondents in this study did  
416 not find social interactions in the yard stressful corroborates this. Evidence shows that burnout is more  
417 likely to occur when interpersonal relationships are poor [48] and the contrary low burnout rate found  
418 in this study could be attributed to the good interpersonal relations between officers and officers and  
419 inmates.

420 Other notable coping strategies included looking talking to relatives, looking forward to days off and  
421 taking advantage of employee assistance programs. Most researchers report that prison officers cope  
422 well with stress through support from relatives, friends, and colleagues. This line of discussion is  
423 confirmed by the results of this study which is reflected in the top three coping strategies adopted by  
424 participants. It can be explained by the fact that although the mechanism of coping adopted by the PO  
425 is influenced by purely personal factors, it may also be favored by the work context [49]. In addition,  
426 some forms of social support have been found to be advantageous to certain constructs of burnout  
427 syndrome [34]. All these individualized approaches; cognitive-behavioral interventions and  
428 interpersonal skills interventions.

429 The organizational strategies employed by respondents include engaging in sporting activities, off-  
430 duties and employee assistance programs. Alcohol use was identified as the least coping strategy  
431 utilized by prison officers

### 432 **Socio-demographic Factors and Burnout**

433 In determining factors associated with burnout among prison officers, sex was found to have a  
434 significant association in this study. Female officers were more likely to experience burnout compared  
435 to their male counterparts. In this regard, this study showed similar trend with a study among  
436 correctional officers in Spain [12] and United States [50]. Results from the current study showed that  
437 majority of the respondents were males. It is expected that in a male prison like NSMP where the  
438 proportion of male officers is higher than female officers and a significant proportion of the workload  
439 and prison duties is shouldered by them [18], they are more likely to experience burnout. However,  
440 this inconsistent finding could be attributed to the fact that men in Africa have reportedly been shown  
441 to be more prone to mental health issues because of internalizing masculine ideals. They engage in  
442 constrictive emotionality through defensive strategies by downplaying their mental health issues and  
443 status because of ingrained and institutionalized views [51]. Perhaps this may have reflected in their  
444 responses in this study. This phenomenon is also characterized in their health seeking behaviours [52].  
445 Furthermore, research mentions how female officers may find the prison environment more stressful  
446 given the hazardous and risky nature of prison environment [53]. In their study, Ghaziri et al., [50]  
447 found that female correctional nurses reported higher levels of verbal abuse and sexual harassment by  
448 prisoners than male nurses in the same prison.

449 Of particular interest is how female officers at NSMP who are assigned duty points that do not put  
450 them in direct contact with inmates for long relative to their male counterparts such as escorting  
451 inmates and block duties and are restricted to the office-space (administrative duties) and workshops

452 are more burned out [21]. An explanation for this observation is that those assigned duty points at the  
453 offices and workshops run the main shift (8am -4pm) which could be associated with higher  
454 workload; they have deal with the poor logistical support of administration and are more prone to the  
455 perceived influence from administrative supervisors [8] unlike their male colleagues. Also, just like  
456 female prisoners who constitute a minority among inmate population whose needs may be neglected,  
457 there is the likelihood that these female officers may have unmet needs predisposing them to burnout.

## 458 **Conclusions**

459 The study underscores the need to pay attention to irregular shift, heavy workload, and regular  
460 training and opportunities for development to reduce burnout syndrome among POs. The study further  
461 concludes POs experience high levels of emotional exhaustion and depersonalization and low levels  
462 of personal accomplishment. In addition, emotional exhaustion was common among Officers running  
463 night shifts whilst Junior Officers experienced more depersonalization. POs adopted positive coping  
464 mechanisms.

465

## 466 **Competing Interests**

467 The authors declare that no conflict of interest exist.

## 468 **Authors' Contributions**

469 FD conceived the idea, wrote the proposal, participated data collection and analysis. PT-NT provided  
470 technical support on the methodology, data analysis and wrote the draft manuscript. All authors read  
471 and approved the final version of the manuscript.

## 472 **Acknowledgements**

473 We acknowledge the support of Prison Service for allowing us to conduct this study.

474

475

## 476 **References**

- 477 1. WHO. Raising Awareness of Stress at Work in Developing Countries: A modern hazard in a  
478 traditional working environment. Geneva; 2007.
- 479 2. Chetlen AL, Chan TL, Ballard DH, Frigini LA, Hildebrand A, Kim S, et al. Addressing  
480 Burnout in Radiologists. *Acad Radiol*. 2019;26: 526–533. doi:10.1016/j.acra.2018.07.001
- 481 3. Maslach C, Jackson SE. The measurement of experienced burnou. *J Occup Behav*. 1981;2:  
482 99–113.
- 483 4. Lu Y, Liu Q, Yan H, Gao S, Liu T. Job burnout and its impact on work ability in biosafety  
484 laboratory staff during the COVID-19 epidemic in Xinjiang. *BMC Psychiatry*. 2021;21: 1–13.  
485 doi:10.1186/s12888-021-03555-x
- 486 5. Veldhuis GA, Sluijs T, van Zwieten MHJ, Bouwman J, Wiezer NM, Wortelboer HM. A proof-  
487 of-concept system dynamics simulation model of the development of burnout and recovery  
488 using retrospective case data. *Int J Environ Res Public Health*. 2020;17: 1–28.  
489 doi:10.3390/ijerph17165964
- 490 6. Woo T, Ho R, Tang A, Tam W. Global prevalence of burnout symptoms among nurses: A  
491 systematic review and meta-analysis. *J Psychiatr Res*. 2020;123: 9–20.  
492 doi:10.1016/j.jpsychires.2019.12.015

- 493 7. Low ZX, Yeo KA, Sharma VK, Leung GK, McIntyre RS. Low: Prevalence of burnout in  
494 medical and surgical... - Google Scholar. *Environ Res Public Heal*. 2019;16: 1–22. Available:  
495 [https://scholar.google.com/scholar\\_lookup?title=Prevalence of burnout in medical and surgical](https://scholar.google.com/scholar_lookup?title=Prevalence of burnout in medical and surgical residents%3A a meta-analysis&author=Z.X. Low&publication_year=2019)  
496 [residents%3A a meta-analysis&author=Z.X. Low&publication\\_year=2019](https://scholar.google.com/scholar_lookup?title=Prevalence of burnout in medical and surgical residents%3A a meta-analysis&author=Z.X. Low&publication_year=2019)
- 497 8. Schaufeli WB, Bakker AB. Job demands, job resources, and their relationship with burnout  
498 and engagement: A multi-sample study. *J Organ Behav*. 2004;25: 293–315.  
499 doi:10.1002/job.248
- 500 9. Sarkin J. Prisons in Africa. *Int J Hum Rights*. 2008.
- 501 10. Forouzanfar MH, Alexander L, Bachman VF, Biryukov S, Brauer M, Casey D, et al. Global,  
502 regional, and national comparative risk assessment of 79 behavioural, environmental and  
503 occupational, and metabolic risks or clusters of risks in 188 countries, 1990-2013: A  
504 systematic analysis for the Global Burden of Disease Study 2013. *Lancet*. 2015;386: 2287–  
505 2323. doi:10.1016/S0140-6736(15)00128-2
- 506 11. Martin TM, Jefferson AM. *Prison Ethnography in Africa: Reflections on a Maturing Field*.  
507 *Polit africaine*. 2019.
- 508 12. Da Silva Venâncio L, Coutinho BD, Mont’Alverne DGB, Andrade RF. Burnout and quality of  
509 life among correctional officers in a women’s correctional facility. *Rev Bras Med do Trab*.  
510 2020;18: 312–321. doi:10.47626/1679-4435-2020-561
- 511 13. Useche SA, Montoro L V., Ruiz JI, Vanegas C, Sanmartin J, Alfaro E. Workplace burnout and  
512 health issues among Colombian correctional officers. *PLoS One*. 2019.
- 513 14. Clements AJ, Kinman G. Job demands, organizational justice, and emotional exhaustion in  
514 prison officers. *Crim Justice Stud*. 2021;34.
- 515 15. Finney C, Stergiopoulos E, Hensel J, Bonato S, Dewa CS. Organizational stressors associated  
516 with job stress and burnout in correctional officers: a systematic review. *BMC Public Health*.  
517 2013;13: 82. doi:10.1186/1471-2458-13-82
- 518 16. Jun Bo S, Alkadash TM, Beshar B, Almaamari Q, Saif Mohsen Al-Absy M, Alkadash M, et al.  
519 Conceptual Framework on Job Burnout of the Employees and Its Correlative Factors in China  
520 During Coivd-19. *Int J Manag*. 2020;11: 200–215. doi:10.34218/IJM.11.10.2020.020
- 521 17. Republic of Ghana. Prisons Service (General Administration) Regulations. 2016.
- 522 18. Ghana Prison Service. Human Resource management Report. 2022.
- 523 19. Jackson SE, Maslach C. *After-Effects of Job-Related Stress : Families as Victims* Author. *J*  
524 *Organ Behav*. 1982;3: 63–77.
- 525 20. Morgan RD, Pearson CA. Correctional Officer Burnout: Further Analyses. *Crim Justice*  
526 *Behav*. 2002;29: 144–160.
- 527 21. Service GP. Human Resource Report. Accra; 2020.
- 528 22. Yamane T. *An Introductory Analysis*. Michigan: Harper & Row; 1967.
- 529 23. Maslach C, Jackson SE, Leiter MP. *Maslach Burnout Inventory*. Berkeley: University of  
530 California; 1997.
- 531 24. Schaefer JA, Moos RH. Effects of Work Stressors and Work Climate on Long-Term Care  
532 Staff’s Job Morale and Functioning. *Res Nurs Heal*. 1996;19: 63–73. doi:10.1002/(SICI)1098-  
533 240X(199602)19:1<63::AID-NUR7>3.0.CO;2-J
- 534 25. Alexander DA, Wells A. Reactions of police officers to body-handling after a major disaster.  
535 A before-and-after comparison. *Br J Psychiatry*. 1991;159: 547–555.

- 536 doi:10.1192/bjp.159.4.547
- 537 26. Ayisi-Boateng NK, Bankah EM, Ofori-Amankwah GK, Egblewogbe DA, Ati E, Opoku DA, et  
538 al. A cross-sectional self-assessment of burnout amongst a sample of doctors in Ghana.  
539 African J Prim Heal Care Fam Med. 2020;12: 1–6. doi:10.4102/PHCFM.V12I1.2336
- 540 27. Konlan KD, Asampong E, Dako-Gyeke P, Glozah FN. Burnout syndrome among healthcare  
541 workers during COVID-19 Pandemic in Accra, Ghana. PLoS One. 2022;17: 1–21.  
542 doi:10.1371/journal.pone.0268404
- 543 28. Almutairi MN, Azza AA. Burnout and coping methods among emergency medical services  
544 professionals. J Multidiscip Healthc. 2020;13: 271–279. doi:10.2147/JMDH.S244303
- 545 29. Abdo SAM, El-Sallamy RM, El-Sherbiny AAM, Kabbash IA. Burnout among physicians and  
546 nursing staff working in the emergency hospital of Tanta university, Egypt. East Mediterr Heal  
547 J. 2015;21: 906–915.
- 548 30. Dubale BW, Friedman LE, Chemali Z, Denninger JW, Mehta DH, Alem A, et al. Systematic  
549 review of burnout among healthcare providers in sub-Saharan Africa. BMC Public Health.  
550 2019;19.
- 551 31. Stanislava N Harizanova THT. Professional burnout syndrome among correctional facility  
552 officers. Folia Med. 2013;55: 73–9.
- 553 32. Whitehead JT, Lindquist CA. Correctional Officer Job Burnout: A Path Model. J Res Crime  
554 Delinq. 2016.
- 555 33. Odonkor ST. Burnout among Healthcare Professionals in Ghana : A Critical Assessment.  
556 Biomed Res Int. 2020;2020. doi:10.1155/2020/1614968
- 557 34. Lambert EG, Altheimer I, Hogan NL. Exploring the relationship between social support and  
558 job burnout among correctional staff. Crim Justice Behav. 2010;37: 1217–1236.
- 559 35. Alexander J. The political imaginaries and social lives of political prisoners in post-2000  
560 Zimbabwe. J South Afr Stud. 2010;36: 483–503.
- 561 36. Hashim D, Boffetta P. Occupational and Environmental Exposures and Cancers in Developing  
562 Countries. Ann Glob Heal. 2014;80: 393–411. doi:10.1016/j.aogh.2014.10.002
- 563 37. Idárraga SMF. What has been written about burnout syndrome in prison officers? Revista  
564 Espanola de Sanidad Penitenciaria. 2022. pp. 87–93. doi:10.18176/resp.00056
- 565 38. Misis M, Kim B, Cheeseman K, Hogan NL, Lambert EG. The impact of correctional officer  
566 perceptions of inmates on job stress. SAGE Open. 2013;3: 1–13.  
567 doi:10.1177/2158244013489695
- 568 39. Oliveira R, Schneider V, Bonafé F, Maroco J, Campos J. Occupational characteristics and  
569 Burnout Syndrome in Brazilian correctional staff. Work. 2016;55: 215–223.
- 570 40. Rowe JW, Kahn RL. Human Aging: Usual and Successful. Sci New Ser. 1987;237: 143–149.
- 571 41. Boateng FD, Hsieh M. Explaining Job Satisfaction and Commitment Among Prison Officers :  
572 The Role of Organizational Justice. Prison J. 2019;9: 172–193.  
573 doi:10.1177/0032885519825491
- 574 42. Bierie DM. The impact of prison conditions on staff well-being. Int J Offender Ther Comp  
575 Criminol. 2012;56: 81–95. doi:10.1177/0306624X10388383
- 576 43. Galanek JD. Correctional Officers and the Incarcerated Mentally Ill: Responses to Psychiatric  
577 Illness in Prison. Med Anthropol Q. 2015;2.
- 578 44. Lindwall M, Ljung T, Hadžibajramović, E. Jonsdottir IH. Self-reported physical activity and



- 579 aerobic fitness are differently related to mental health. *Ment Health Phys Act.* 2012;5.
- 580 45. Thomson P, Jaque S V. Depersonalization, adversity, emotionality, and coping with stressful  
581 situations. *J Trauma Dissociation.* 2018;19: 143–161.
- 582 46. Morgan RD, Van Haveren RA, Pearson CA. Correctional officer burnout: Further analyses.  
583 *Crim Justice Behav.* 2002;29: 144–160.
- 584 47. Maricuțoiu LP, Sava FA, Butta O. The effectiveness of controlled interventions on employees’  
585 burnout: A meta-analysis. *J Occup Organ Psychol.* 2016;89: 1–27. doi:10.1111/joop.12099
- 586 48. Gao J, Du X, Gao Q. Analysis of burnout and its influencing factors among prison police.  
587 *Front Public Heal.* 2022;10. doi:10.3389/fpubh.2022.891745
- 588 49. Maresca G, Corallo F, Catanese G, Formica C, Lo Buono V. Coping Strategies of Healthcare  
589 Professionals with Burnout Syndrome: A Systematic Review. *Med.* 2022;58.  
590 doi:10.3390/medicina58020327
- 591 50. Ghaziri M El, Dugan AG, Zhang Y, Gore R, Castro ME. Sex and gender role differences in  
592 occupational exposures and work outcomes among registered nurses in correctional settings.  
593 *Ann Work Expo Heal.* 2019;63: 568–582. doi:10.1093/annweh/wxz018
- 594 51. Ezeugwu CR, Ojedokun O. Masculine norms and mental health of African men: what can  
595 psychology do? *Heliyon.* 2020;6: e05650. doi:10.1016/j.heliyon.2020.e05650
- 596 52. Teh JKL, Tey NP, Ng ST. Ethnic and gender differentials in non-communicable diseases and  
597 self-rated health in Malaysia. *PLoS One.* 2014;9: 1–8. doi:10.1371/journal.pone.0091328
- 598 53. Soh M, Zarola A, Palaiou K, Furnham A. Work-related well-being. *Heal Psychol Open.*  
599 2016;3. doi:10.1177/2055102916628380
- 600



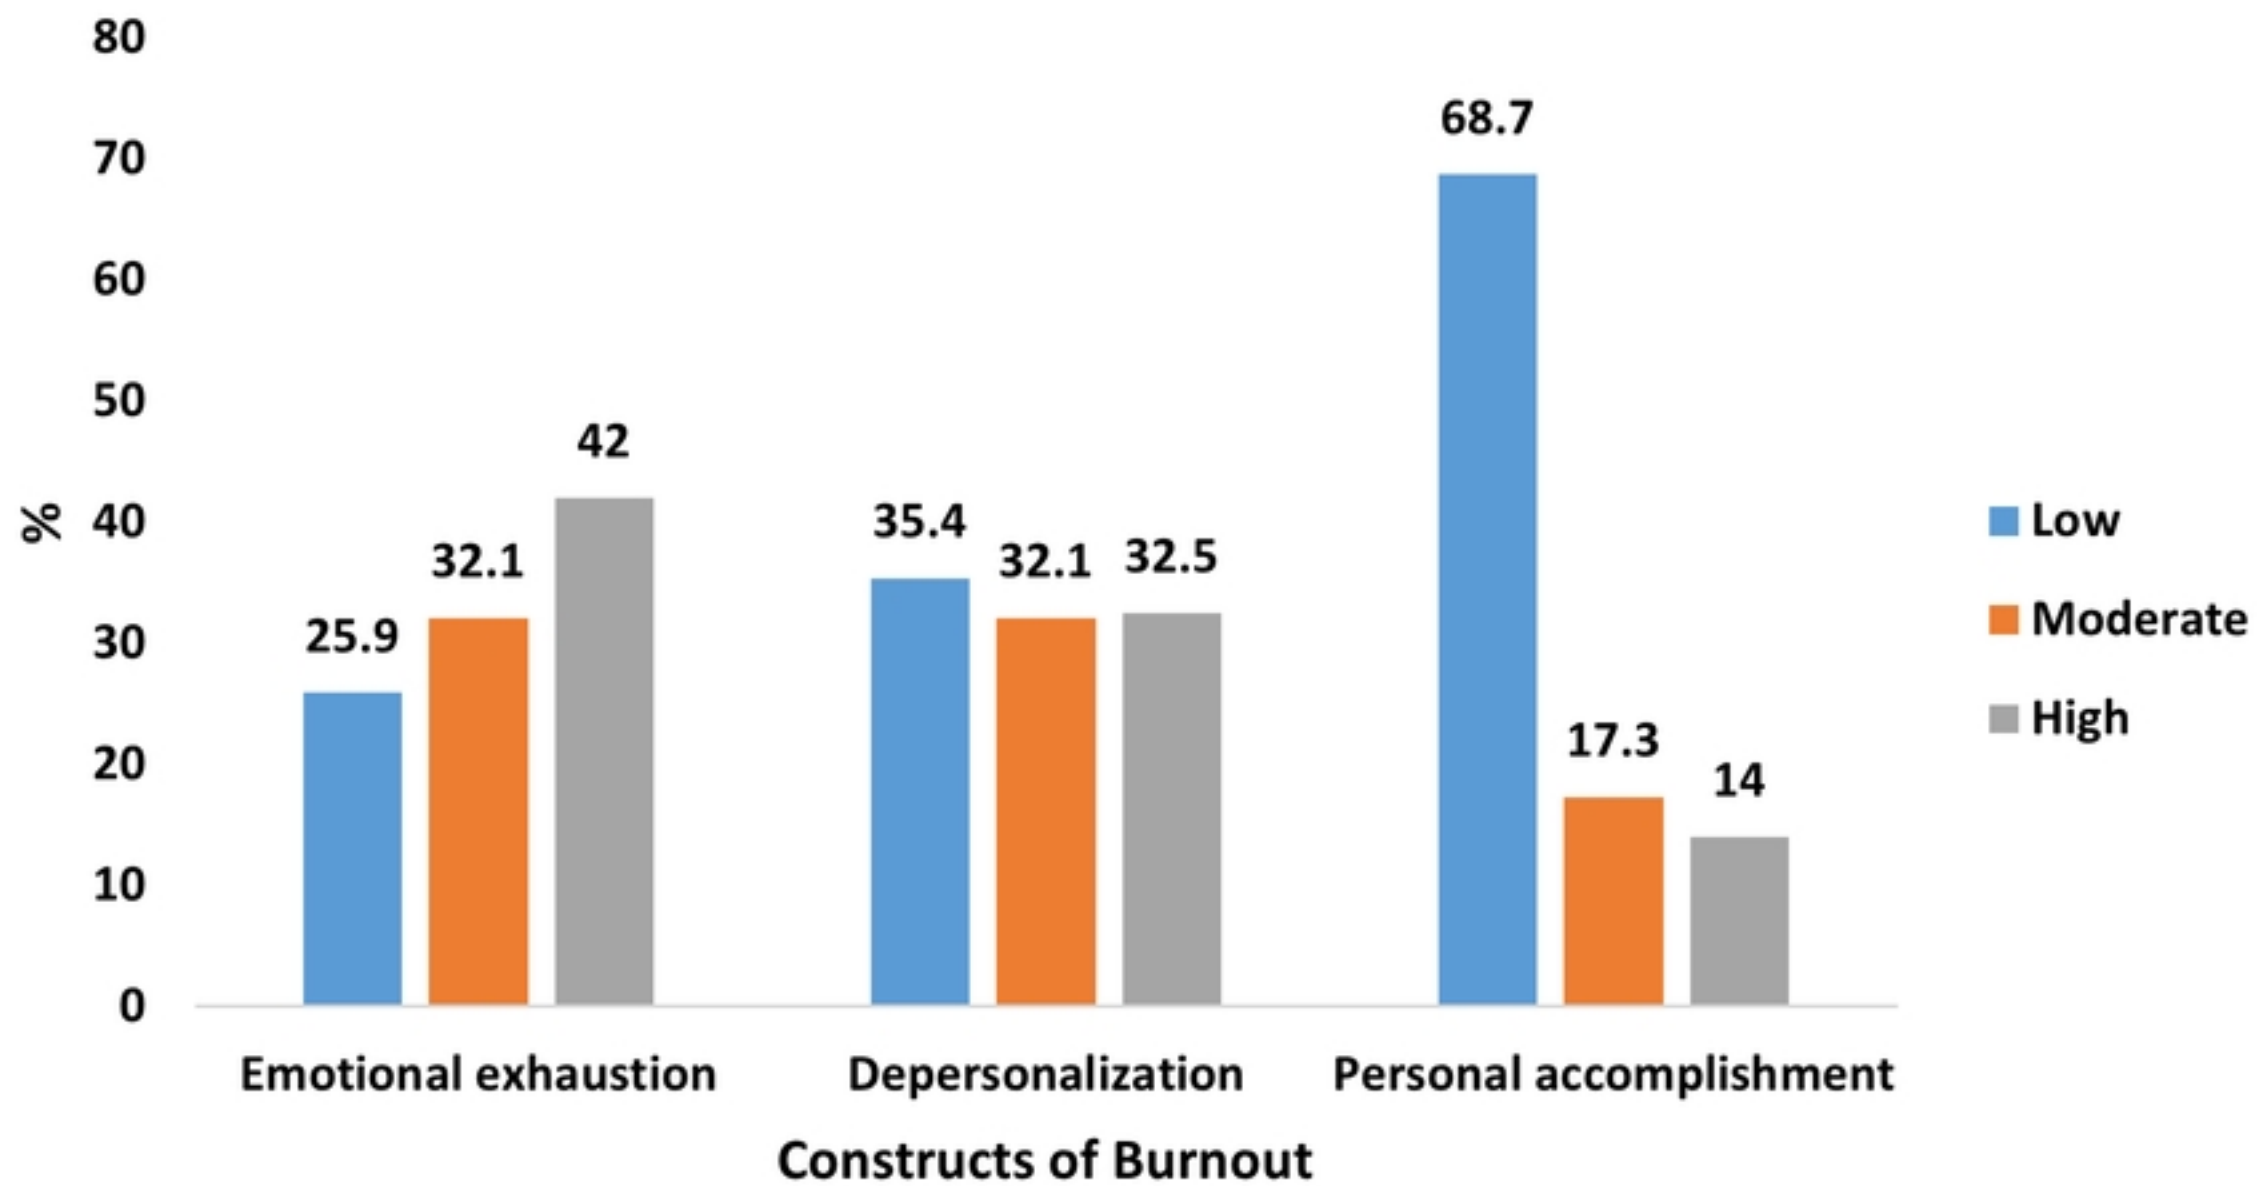

Figure 1

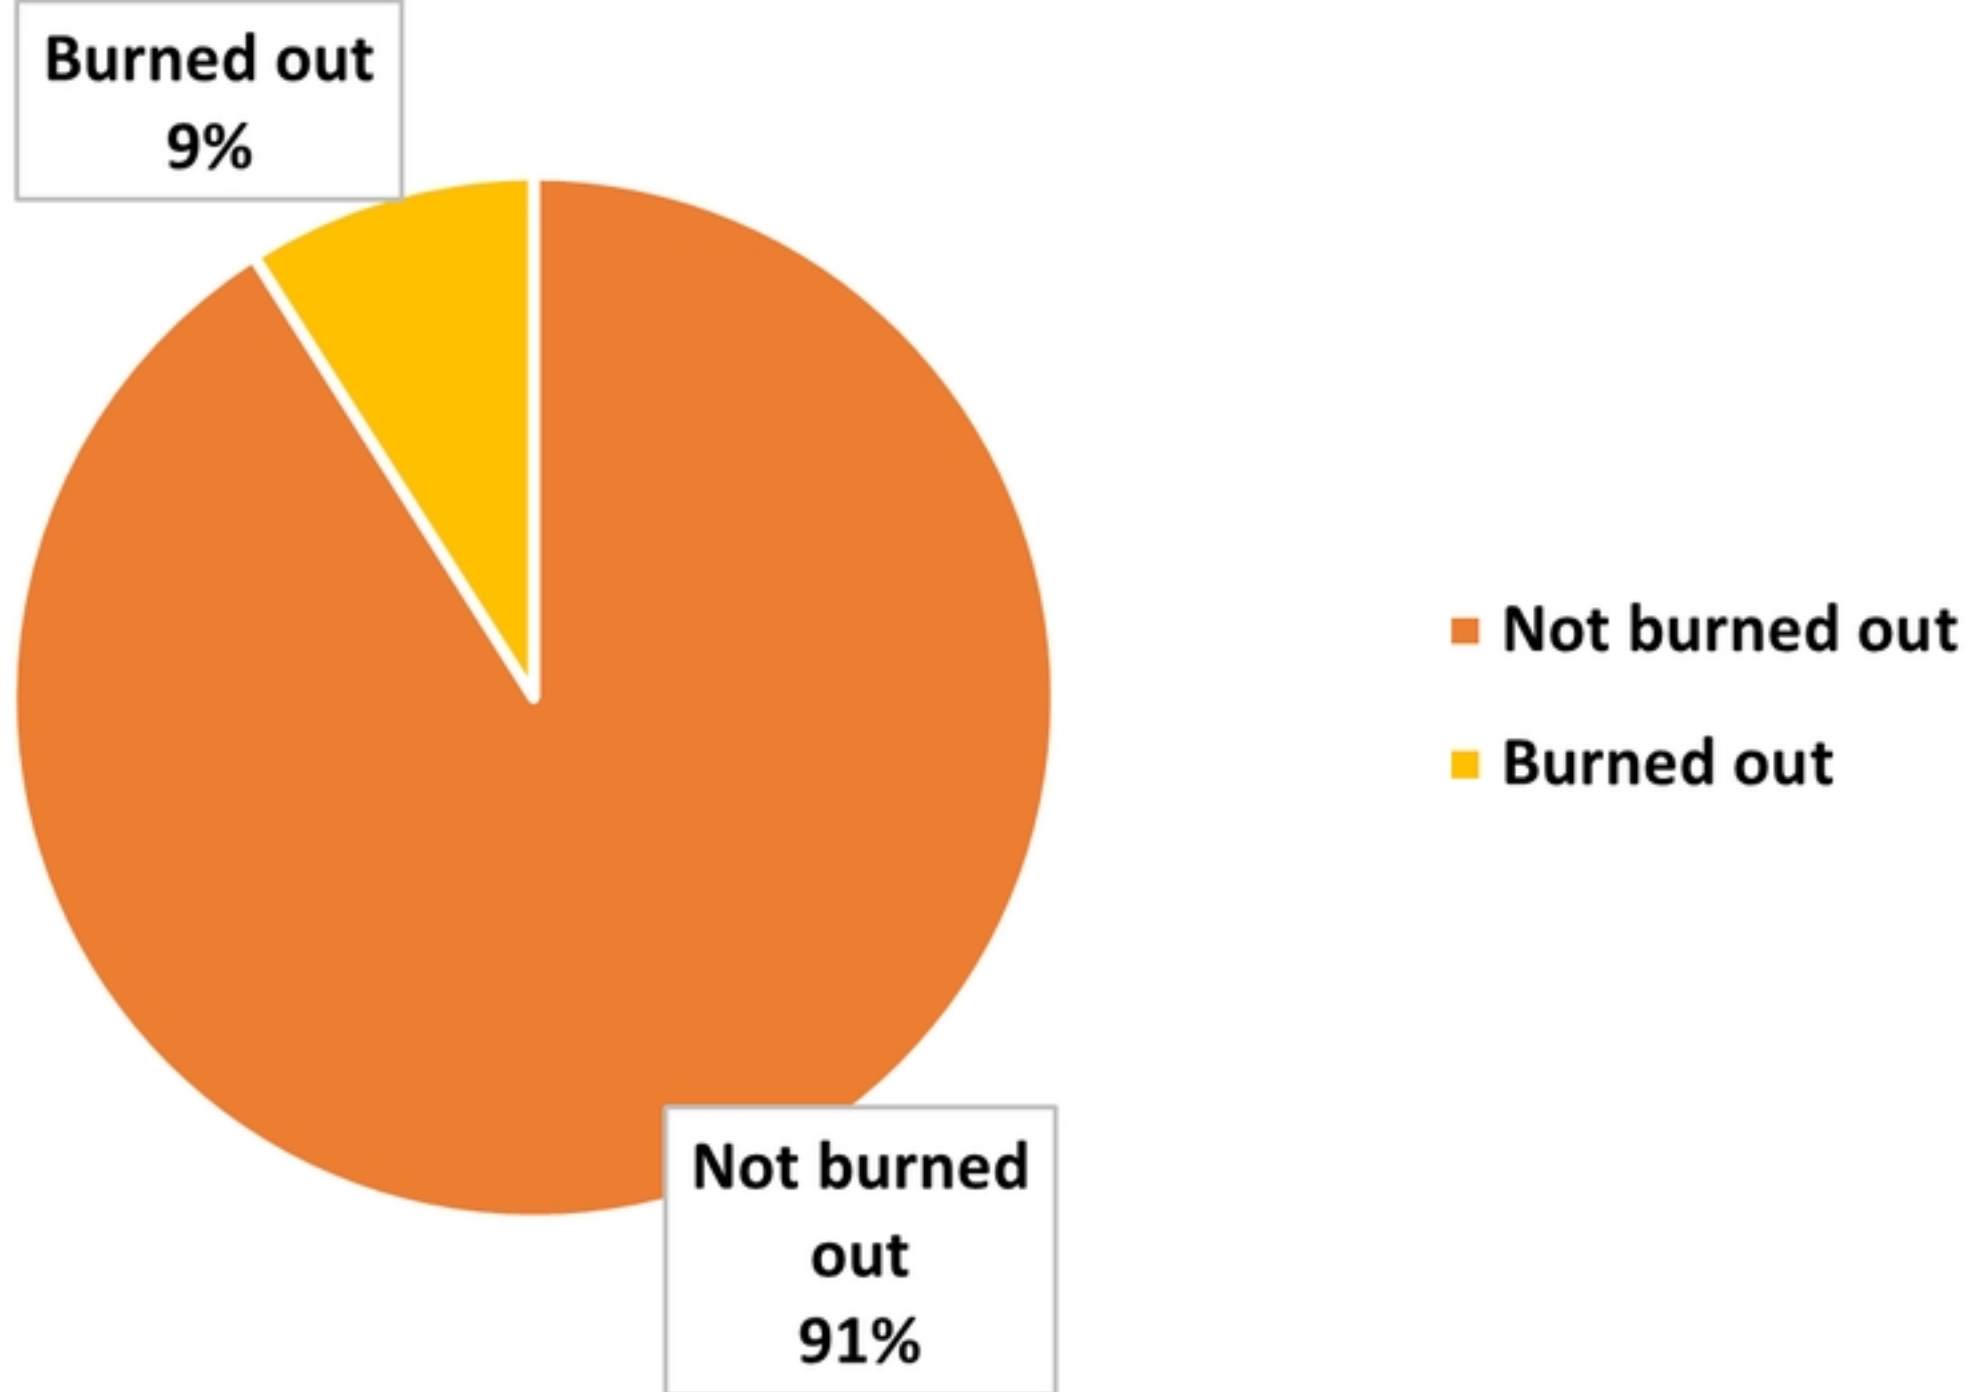

Figure 2

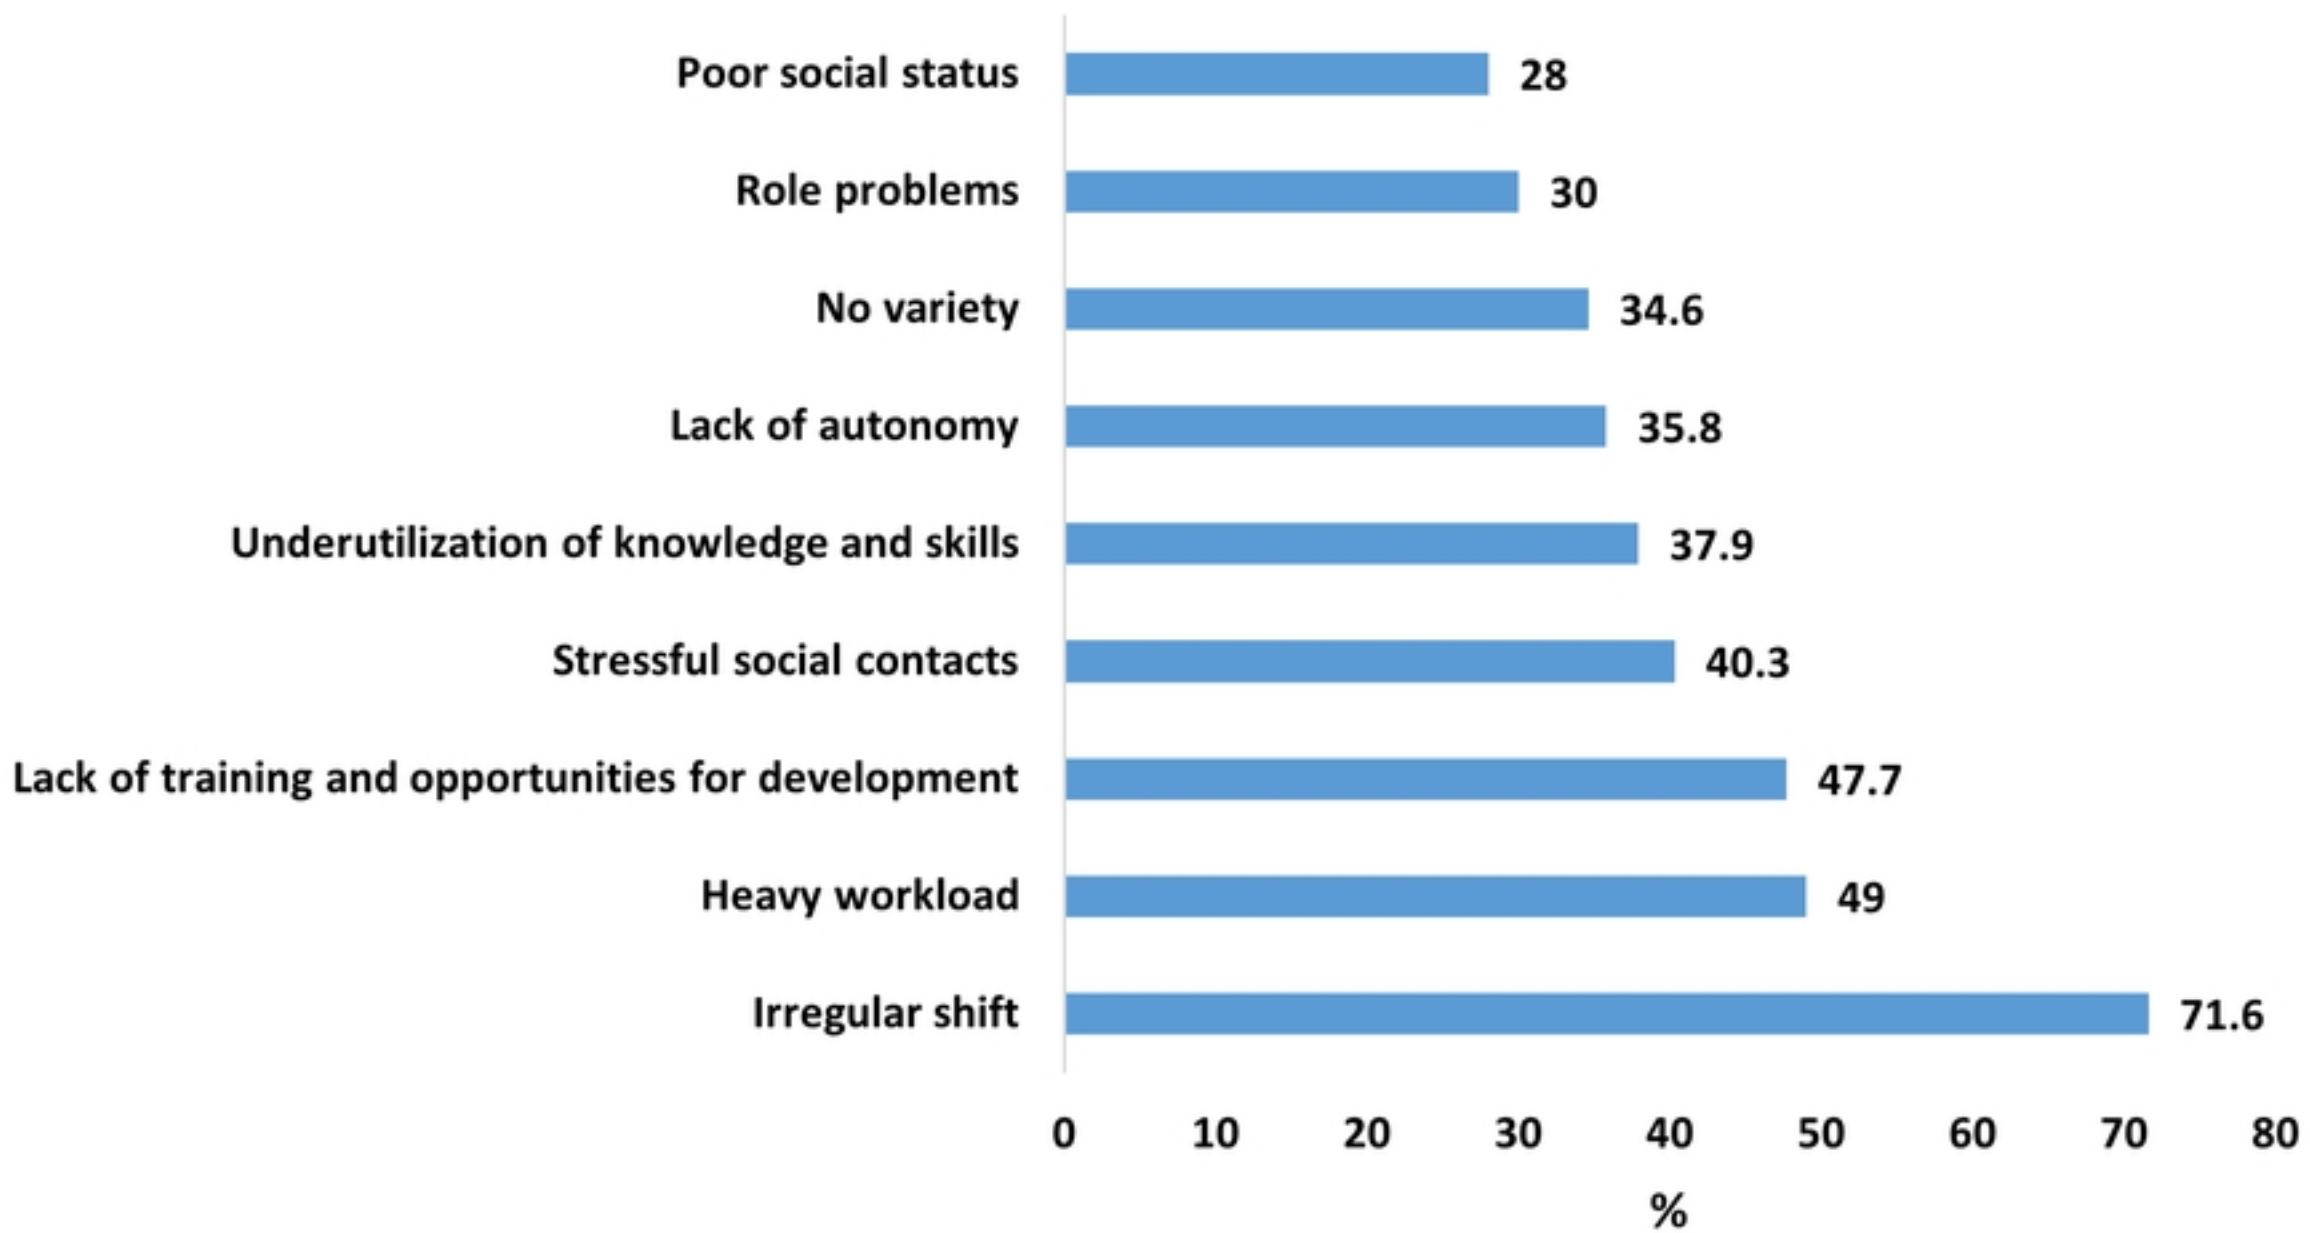

Figure 3

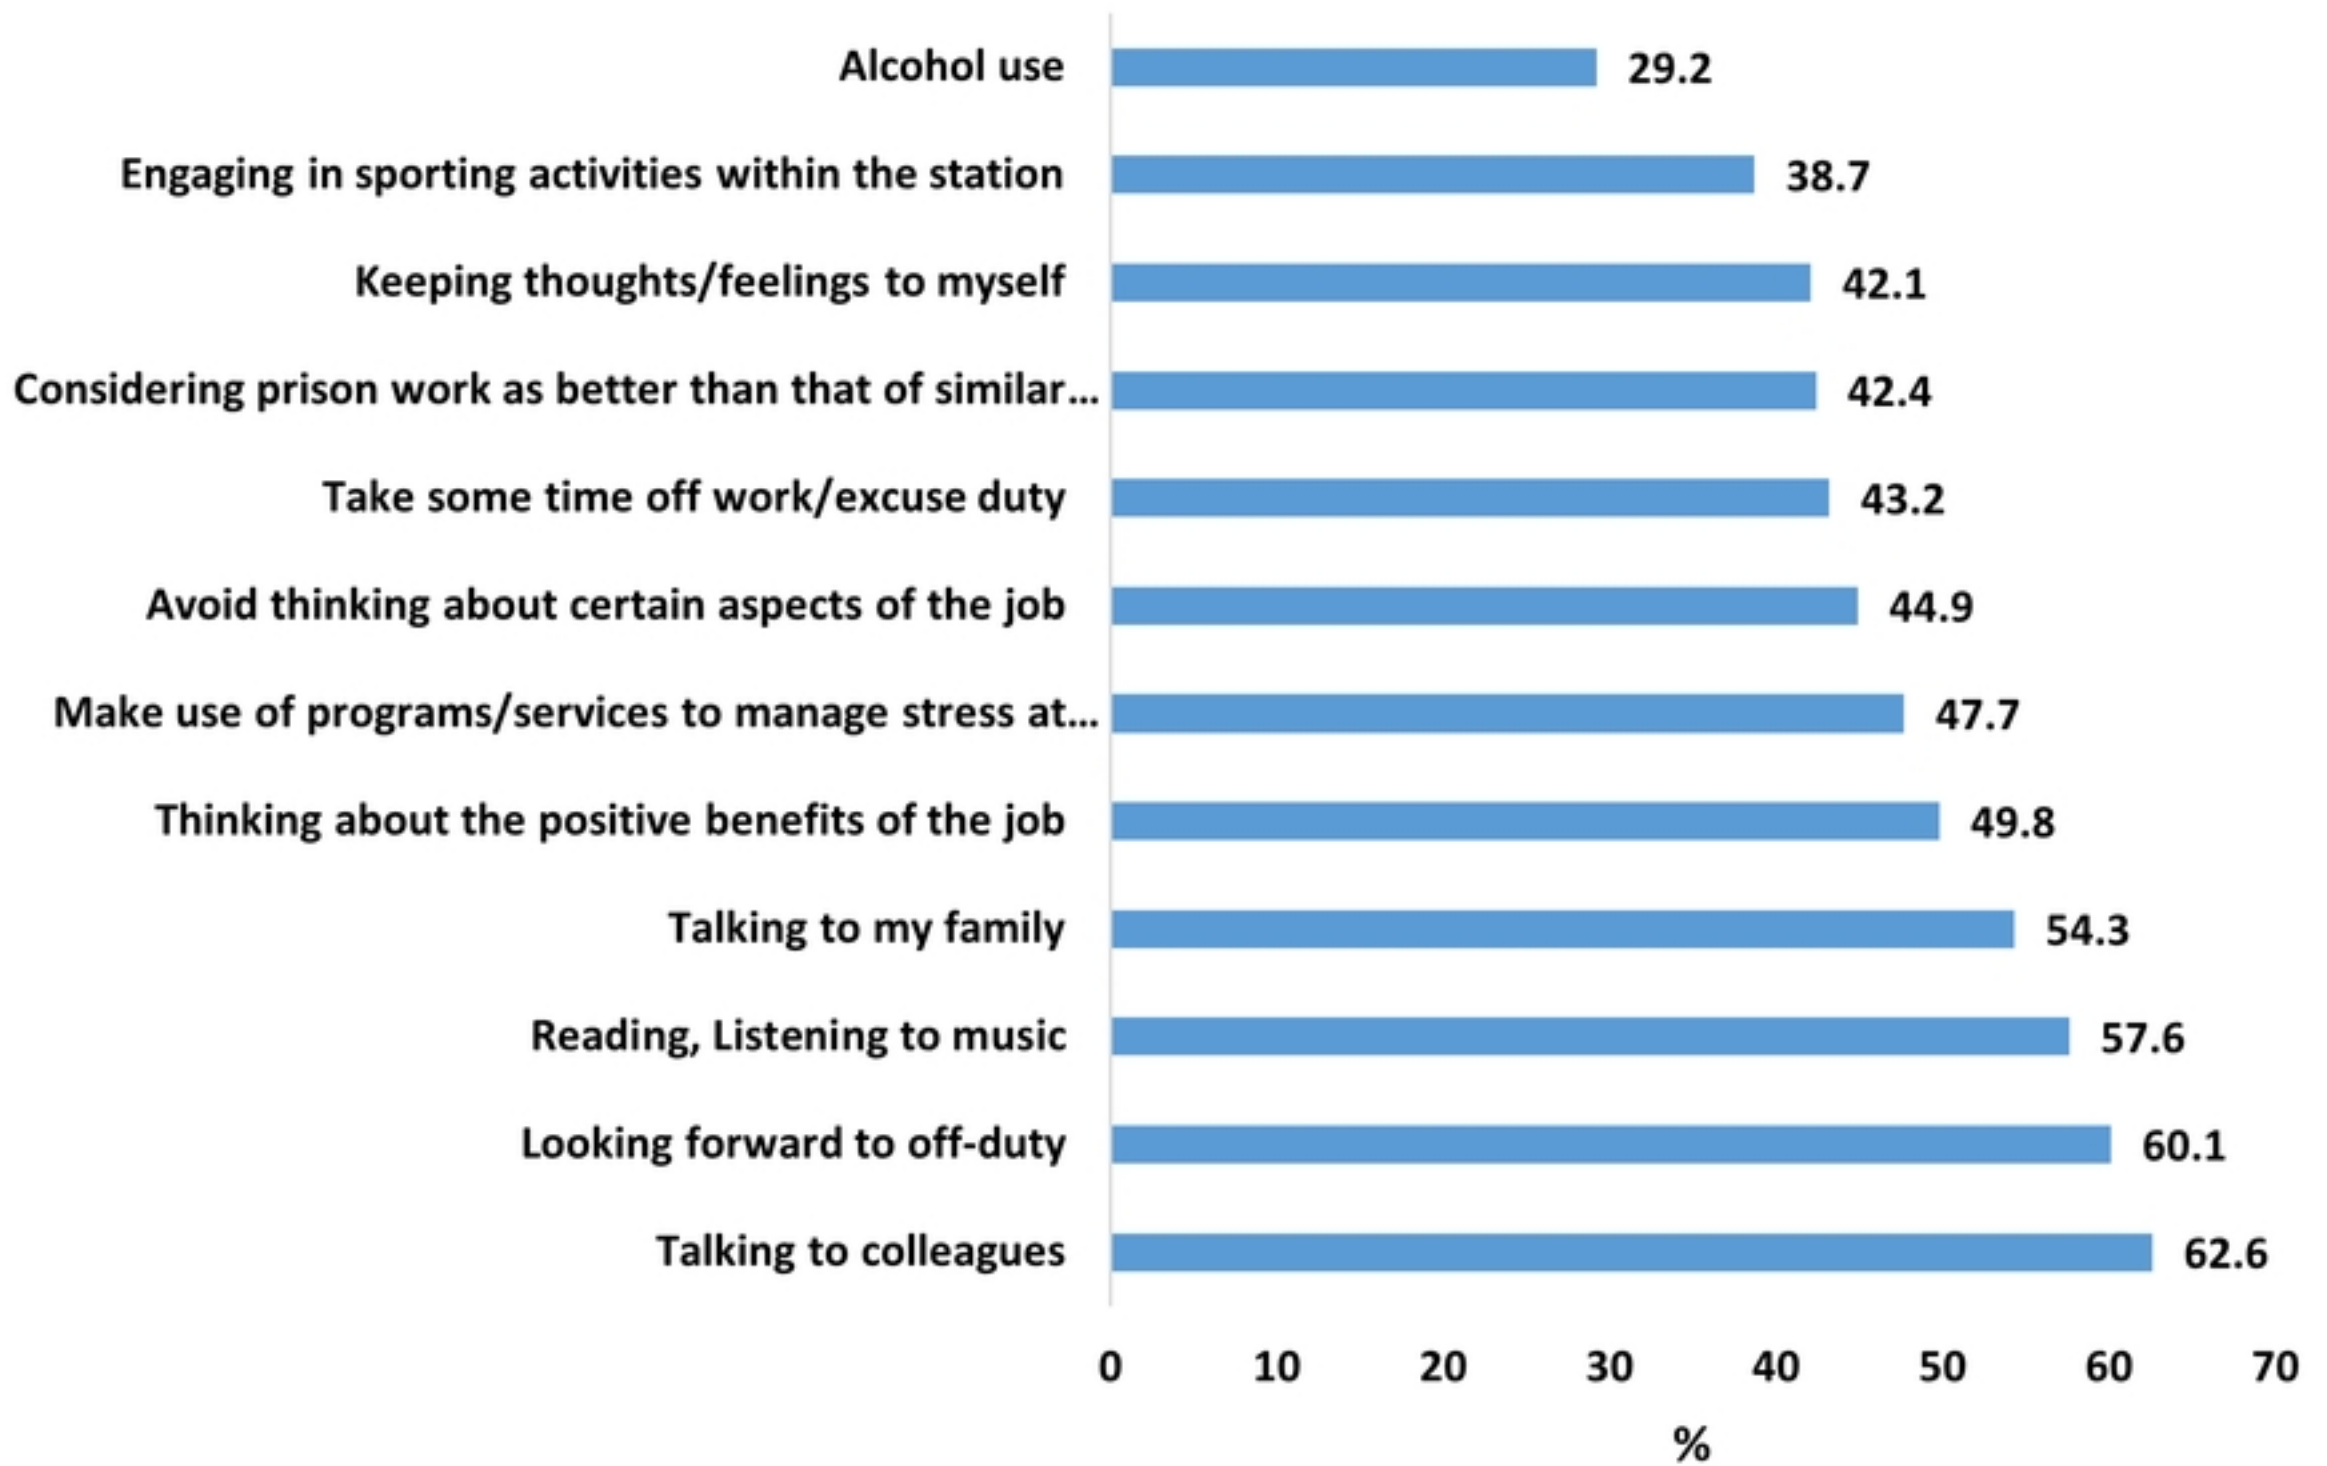

Figure 4
